# Supplementary material for: pH-driven spontaneous recovery of tyrosine via co-precipitation in the indirect aqueous carbonation of gypsum
Source: Royal Society of Chemistry journal article supplement (doi:10.1039/d5ra09358a), 2026-01-01
Supplement: d5ra09358a1.pdf [file d5ra09358a1.pdf]

## pH-Driven Spontaneous Recovery of Tyrosine via Co-precipitation in the Indirect Aqueous Carbonation of Gypsum

Yujie Qu <sup>a</sup>, Yuan Gong <sup>a, b, \*</sup>, Baizhi Wu <sup>a</sup>, Chunlei Li <sup>a</sup>, Lanying Wang <sup>c</sup>, Yi Wang <sup>a, b</sup>

<sup>a</sup> *School of Petrochemical Technology, Lanzhou University of Technology, Lanzhou 730050, PR China*

<sup>b</sup> *Gansu Engineering Research Center for Resource Utilization of New Energy Industry Waste and Waste-Utilized Materials, Lanzhou 730050, PR China*

<sup>c</sup> *Jiuquan Iron and Steel (Group) Co., Ltd., Jiayuguan 735100, PR China*

\*Corresponding author

*E-mail address:* yuangong@lut.edu.cn (Y. Gong)

**Table S1 Factors and levels in the Box-Behnken Design.**

| level | $\alpha$ (mol/mol) | $\beta$ (mol/mol) | $\gamma$ (mL/g) |
|-------|--------------------|-------------------|-----------------|
| -1    | 1.00               | 1.00              | 20.00           |
| 0     | 5.00               | 2.00              | 50.00           |
| 1     | 9.00               | 3.00              | 80.00           |

**Table S2 ANOVA for the calcium leaching model.**

| Source              | Sum of Squares | df | Mean Square | F-value | p-value  |
|---------------------|----------------|----|-------------|---------|----------|
| Model               | 457.28         | 9  | 50.81       | 108.96  | < 0.0001 |
| $\alpha$ - $\alpha$ | 2.48           | 1  | 2.48        | 5.31    | 0.0547   |
| $\beta$ - $\beta$   | 82.50          | 1  | 82.50       | 176.91  | < 0.0001 |
| $\gamma$ - $\gamma$ | 0.0882         | 1  | 0.0882      | 0.1891  | 0.6767   |
| $\alpha\beta$       | 70.14          | 1  | 70.14       | 150.41  | < 0.0001 |
| $\alpha\gamma$      | 23.62          | 1  | 23.62       | 50.65   | 0.0002   |
| $\beta\gamma$       | 3.46           | 1  | 3.46        | 7.42    | 0.0296   |
| $\alpha^2$          | 29.04          | 1  | 29.04       | 62.28   | < 0.0001 |
| $\beta^2$           | 134.95         | 1  | 134.95      | 289.39  | < 0.0001 |
| $\gamma^2$          | 85.03          | 1  | 85.03       | 182.34  | < 0.0001 |
| Residual            | 3.26           | 7  | 0.4663      |         |          |

|             |        |    |        |      |        |
|-------------|--------|----|--------|------|--------|
| Lack of Fit | 2.60   | 3  | 0.8653 | 5.18 | 0.0730 |
| Pure Error  | 0.6684 | 4  | 0.1671 |      |        |
| Cor Total   | 460.55 | 16 |        |      |        |

A polynomial regression equation (Eq. S1) was subsequently developed to correlate  $\varphi$  with the factors  $\alpha$ ,  $\beta$ , and  $\gamma$ . The goodness-of-fit of the equation is evidenced by the reasonable agreement between the predicted  $R^2$  (0.9075) and the adjusted  $R^2$  (0.9838).

$$\begin{aligned} \varphi = & -0.164\alpha^2 - 5.661\beta^2 - 0.005\gamma^2 - 1.047\alpha\beta \\ & + 0.020\alpha\gamma + 0.031\beta\gamma - 20.615 \end{aligned} \quad (\text{Eq. S1})$$

**Table S3 Dissociation constants ( $pK$ ) and isoelectric point ( $pI$ ) of Tyr.**

|     | $pK_1$ | $pK_2$ | $pK_3$ | $pI$ |
|-----|--------|--------|--------|------|
| Tyr | 2.20   | 9.11   | 10.13  | 5.66 |

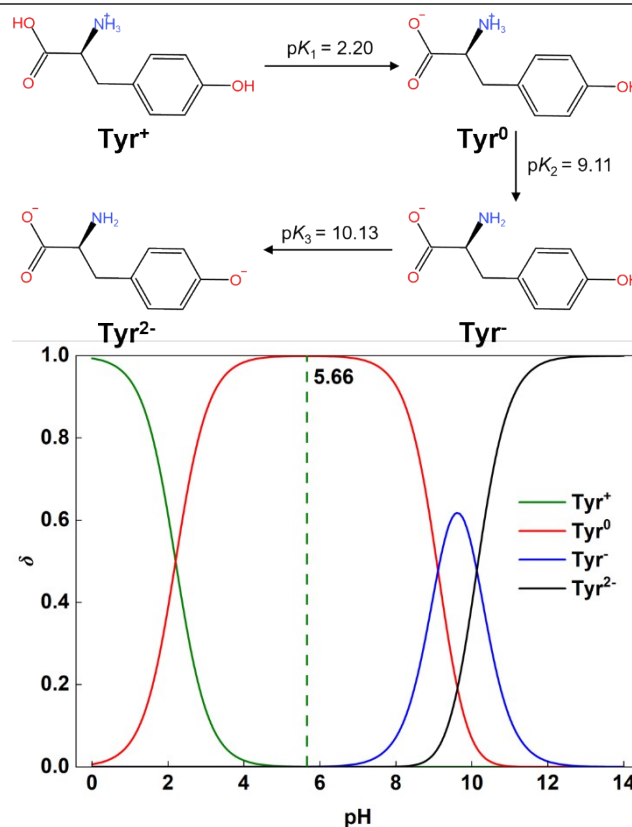

**Fig. S1.** Speciation diagram of Tyr as a function of pH, illustrating the distribution of its different protonation states.

The PSD of the  $\text{CaCO}_3$  products obtained at different reaction times was fitted with the lognormal distribution function (Eq. S2). The fitting results are presented in

Table S4.

$$f(x) = \frac{A}{\sqrt{2\pi}\sigma x} \exp\left[-\frac{\left(\ln \frac{x}{x_c}\right)^2}{2\sigma^2}\right] \quad (\text{Eq. S2})$$

In the equation,  $f(x)$  is the volume density (%),  $x$  is the particle diameter ( $\mu\text{m}$ ),  $x_c$  is the median particle diameter ( $\mu\text{m}$ ),  $\sigma$  is the standard deviation (dimensionless), and  $A$  is the scaling prefactor (dimensionless).

**Table S4** Results of the lognormal distribution fit.

| Parameters    | Reaction time (min) |        | Unit          |
|---------------|---------------------|--------|---------------|
|               | 20                  | 60     |               |
| $A$           | 70.42               | 113.88 | /             |
| $x_c$         | 5.45                | 9.71   | $\mu\text{m}$ |
| $\sigma$      | 0.42                | 0.60   | /             |
| COD ( $R^2$ ) | 0.997               | 0.996  | /             |
